# Supplementary material
Source: MDPI journal article supplement (https://www.mdpi.com/2073-4441/9/4/260)
Supplement: s1 [file s1]

**Supplement:** This supplement elaborates on the detailed water quality measurement campaign conducted in Can Tho on 7 October 2013. These include 4 descriptive tables of water quality data and four processed figures of spatial and temporal variations of contaminants during flood event.

**Table S1.** Water quality parameters recorded in flood locations.

|                       | Xang Thoi lake |    | Can Tho River | Rach Ngong Canal | Hoa Binh Avenue |    | Tran Van Kheo St. |    | Hai Ba Trung St. | Tran Ngoc Que St. | Phan Van Tri St. | Mau Than St. | Quang Trung St. |
|-----------------------|----------------|----|---------------|------------------|-----------------|----|-------------------|----|------------------|-------------------|------------------|--------------|-----------------|
| Water bodies          | SU             | SE | SU            | SU               | FL              | SE | FL                | SE | FL               | FL                | FL               | SE           |                 |
| BOD <sub>5</sub> 20°C | X              | X  | X             | X                | X               | X  | X                 | X  | X                | X                 | X                | X            | X               |
| Total P               | X              | X  | X             | X                | X               | X  | X                 | X  | X                | X                 | X                | X            | X               |
| Total N               | X              | X  | X             | X                | X               | X  | X                 | X  | X                | X                 | X                | X            | X               |
| <i>E.Coli</i>         | X              |    | X             | X                | X               |    | X                 |    | X                | X                 | X                |              |                 |
| Coliform              | X              | X  | X             | X                | X               | X  | X                 | X  | X                | X                 | X                | X            | X               |
| <i>Salmonella</i>     | X              | X  | X             | X                | X               | X  | X                 | X  | X                | X                 | X                | X            | X               |
| Water level           | X              |    |               |                  |                 |    | X                 |    |                  | X                 | X                | X            | X               |
| Sample                | 3              | 3  | 3             | 3                | 3               | 3  | 4                 | 3  | 5                | 5                 | 3                | 3            |                 |

SU: Open/Surface water, SE: Sewer Water, FL: Flood water.

**Table S2.** Water quality analytical methods.

| ID | Parameters               | Units     | Analytical Methods                      |
|----|--------------------------|-----------|-----------------------------------------|
| 1. | BOD <sub>5</sub> at 20°C | mg/l      | Oxitop meter <sup>1</sup>               |
| 2. | Total Nitrogen           | mg/l      | 10071/DR 3900 <sup>2</sup>              |
| 3. | Total Phosphorus         | mg/l      | 10127/DR 3900 <sup>3</sup>              |
| 4. | <i>Salmonella</i>        | MPN/100ml | Most probable number (MPN) <sup>4</sup> |
| 5. | <i>E.coli</i>            | MPN/100ml | MPN                                     |
| 6. | Total Coliform           | MPN/100ml | MPN                                     |

<sup>1</sup> <https://www.wtw.com/en/products/product-categories/benchtop-meters/oxitopr-measuring-systems/oxitopr-is.html> (accessed 27 March 2017)

<sup>2</sup> <https://www.hach.com/tensette-sup-sup-pipet-1-0-10-ml/product-downloads?id=7640447374> (search 10071, accessed 27 March 2017)

<sup>3</sup> <https://www.hach.com/tensette-sup-sup-pipet-1-0-10-ml/product-downloads?id=7640447374> (search 10127, accessed 27 March 2017)

<sup>4</sup> [http://www.who.int/water\\_sanitation\\_health/resourcesquality/wqmchap10.pdf](http://www.who.int/water_sanitation_health/resourcesquality/wqmchap10.pdf)

**Table S3.** Characteristics at flooded sites.

|                            | Tran Van Kheo Str. | Phan Van Tri St. | Quang Trung St. |
|----------------------------|--------------------|------------------|-----------------|
| <b>Rising time *</b>       | 15:00              | 19:00            | 15:00           |
| <b>Time to Peak *</b>      | 19:30              | 20:30            | 19:30           |
| <b>Receding time *</b>     | 20:15              | 21:30            | 21:00           |
| <b>Maximum levels (cm)</b> | 22                 | 13               | 42              |

\*: Referred as “High”, “Peak” and “Low” respectively in **Error! Reference source not found.**

**Table S4.** Descriptive statistics of water data.

|                      |                     | n  | mean | sd   | median | min  | max  |
|----------------------|---------------------|----|------|------|--------|------|------|
| <b>Flood water</b>   |                     |    |      |      |        |      |      |
| <b>BOD</b>           | mg/l                | 15 | 24.8 | 13.4 | 23.0   | 6.0  | 45.0 |
| <b>P</b>             | mg/l                | 15 | 0.5  | 0.3  | 0.5    | 0.1  | 1.1  |
| <b>N</b>             | mg/l                | 14 | 6.4  | 6.6  | 3.4    | 1.4  | 22.8 |
| <i>E.Coli</i>        | Log (10), MPN/100mL | 20 | 4.3  | 4.3  | 4.0    | 3.2  | 4.8  |
| <b>Coliform</b>      | Log (10), MPN/100mL | 20 | 5.8  | 5.7  | 5.7    | 4.0  | 6.3  |
| <i>Salmonella</i>    | Log (10), MPN/100mL | 20 | 3.1  | 3.3  | 2.8    | 2.1  | 4.0  |
| <b>Sewer water</b>   |                     |    |      |      |        |      |      |
| <b>BOD</b>           | mg/l                | 12 | 42.8 | 20.3 | 50.0   | 8.0  | 80.0 |
| <b>P</b>             | mg/l                | 12 | 0.8  | 0.3  | 0.8    | 0.3  | 1.3  |
| <b>N</b>             | mg/l                | 12 | 10.2 | 7.4  | 7.6    | 4.7  | 30.4 |
| <b>Coliform</b>      | Log (10), MPN/100mL | 12 | 7.2  | 7.5  | 6.2    | 4.0  | 8.0  |
| <i>Salmonella</i>    | Log (10), MPN/100mL | 12 | 3.4  | 3.4  | 3.1    | 2.3  | 4.0  |
| <b>Surface water</b> |                     |    |      |      |        |      |      |
| <b>BOD</b>           | mg/l                | 9  | 33.0 | 5.7  | 34.0   | 22.0 | 39.0 |
| <b>P</b>             | mg/l                | 9  | 0.4  | 0.1  | 0.3    | 0.3  | 0.7  |
| <b>N</b>             | mg/l                | 9  | 2.5  | 1.5  | 2.3    | 0.4  | 4.6  |
| <i>E.Coli</i>        | Log (10), MPN/100mL | 9  | 3.5  | 3.2  | 3.5    | 2.3  | 3.8  |
| <b>Coliform</b>      | Log (10), MPN/100mL | 9  | 5.3  | 5.1  | 5.2    | 4.3  | 5.5  |
| <i>Salmonella</i>    | Log (10), MPN/100mL | 9  | 3.4  | 3.7  | 3.0    | 2.4  | 4.2  |

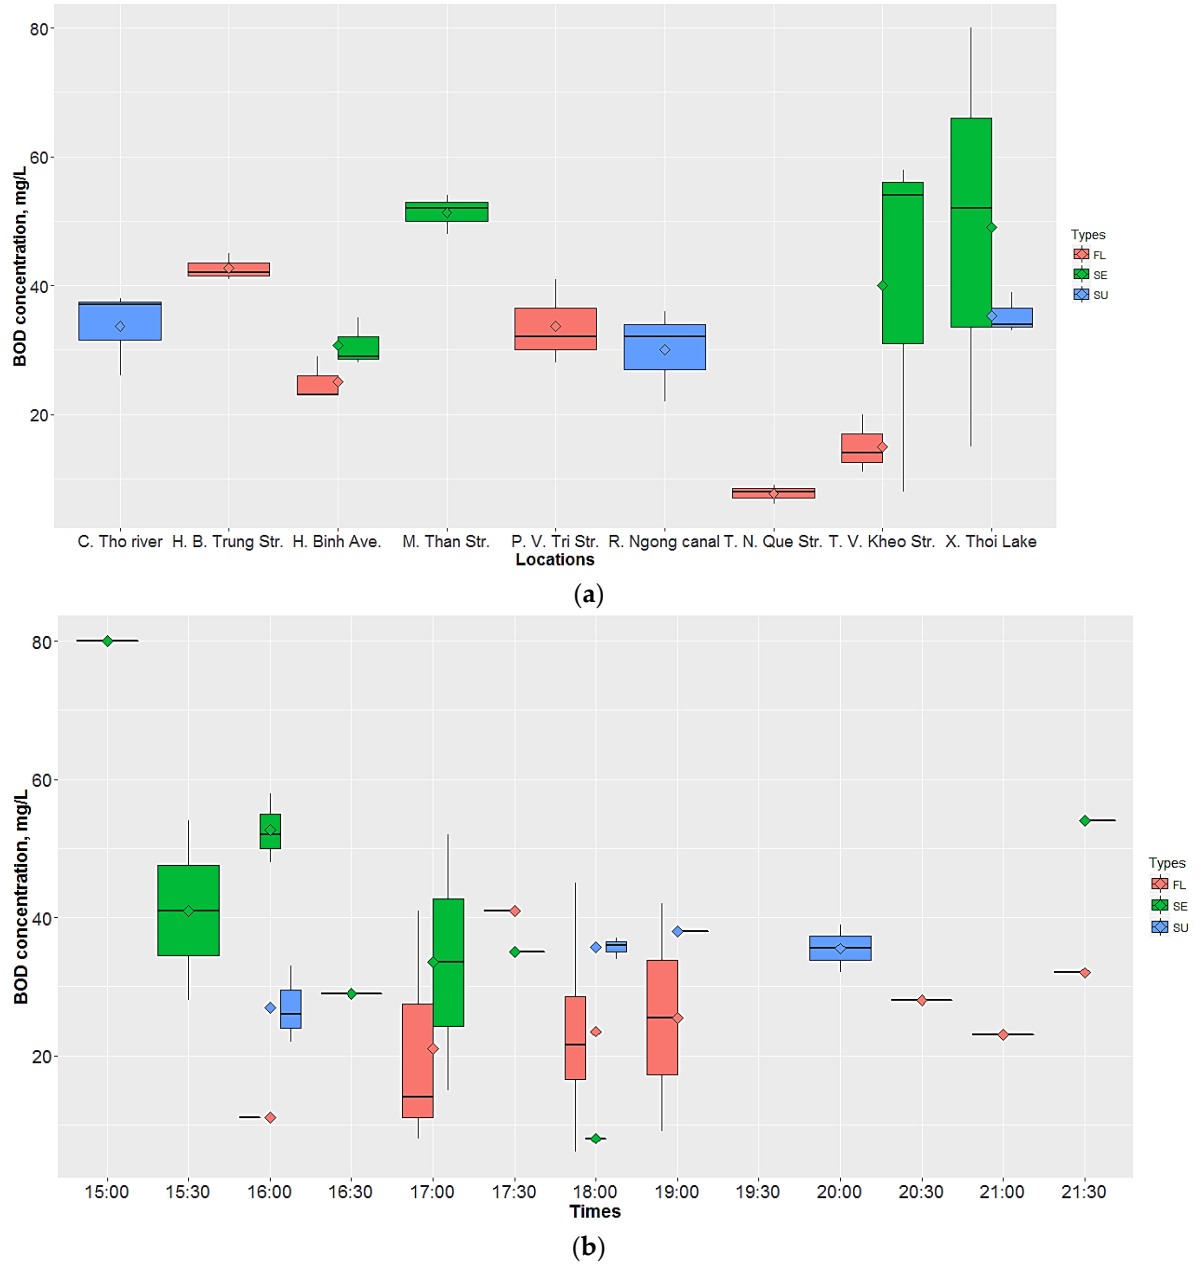

**Figure S1.** Box plot of variations of BOD concentration during flood event Locations **(a)**, Time **(b)** (SU: Open/Surface water, SE: Sewer Water, FL: Flood water; the diamond symbols representing average values).

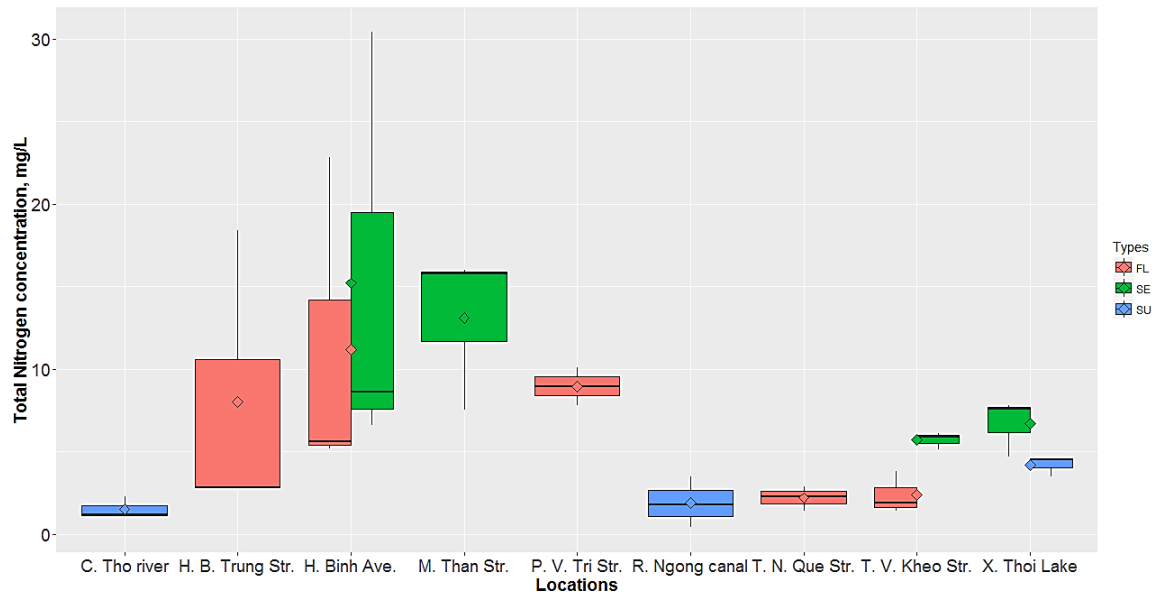

(a)

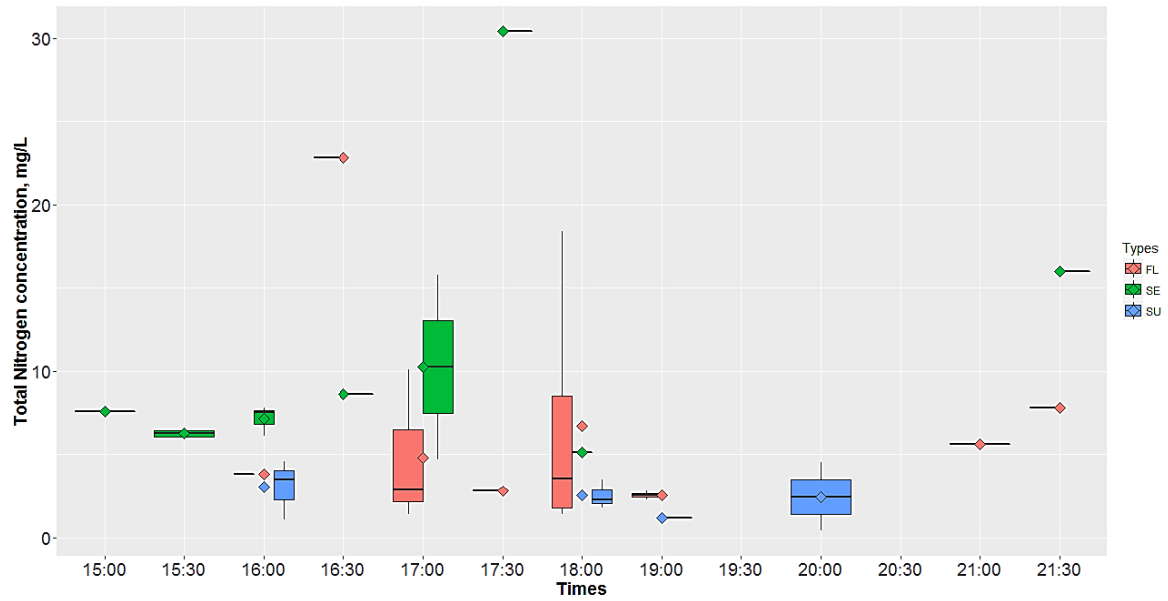

(b)

**Figure S2.** Box plot of variations of Total Nitrogen concentration during flood event Locations (a), Time (b) (SU: Open/Surface water, SE: Sewer Water, FL: Flood water; the diamond symbols representing average values).

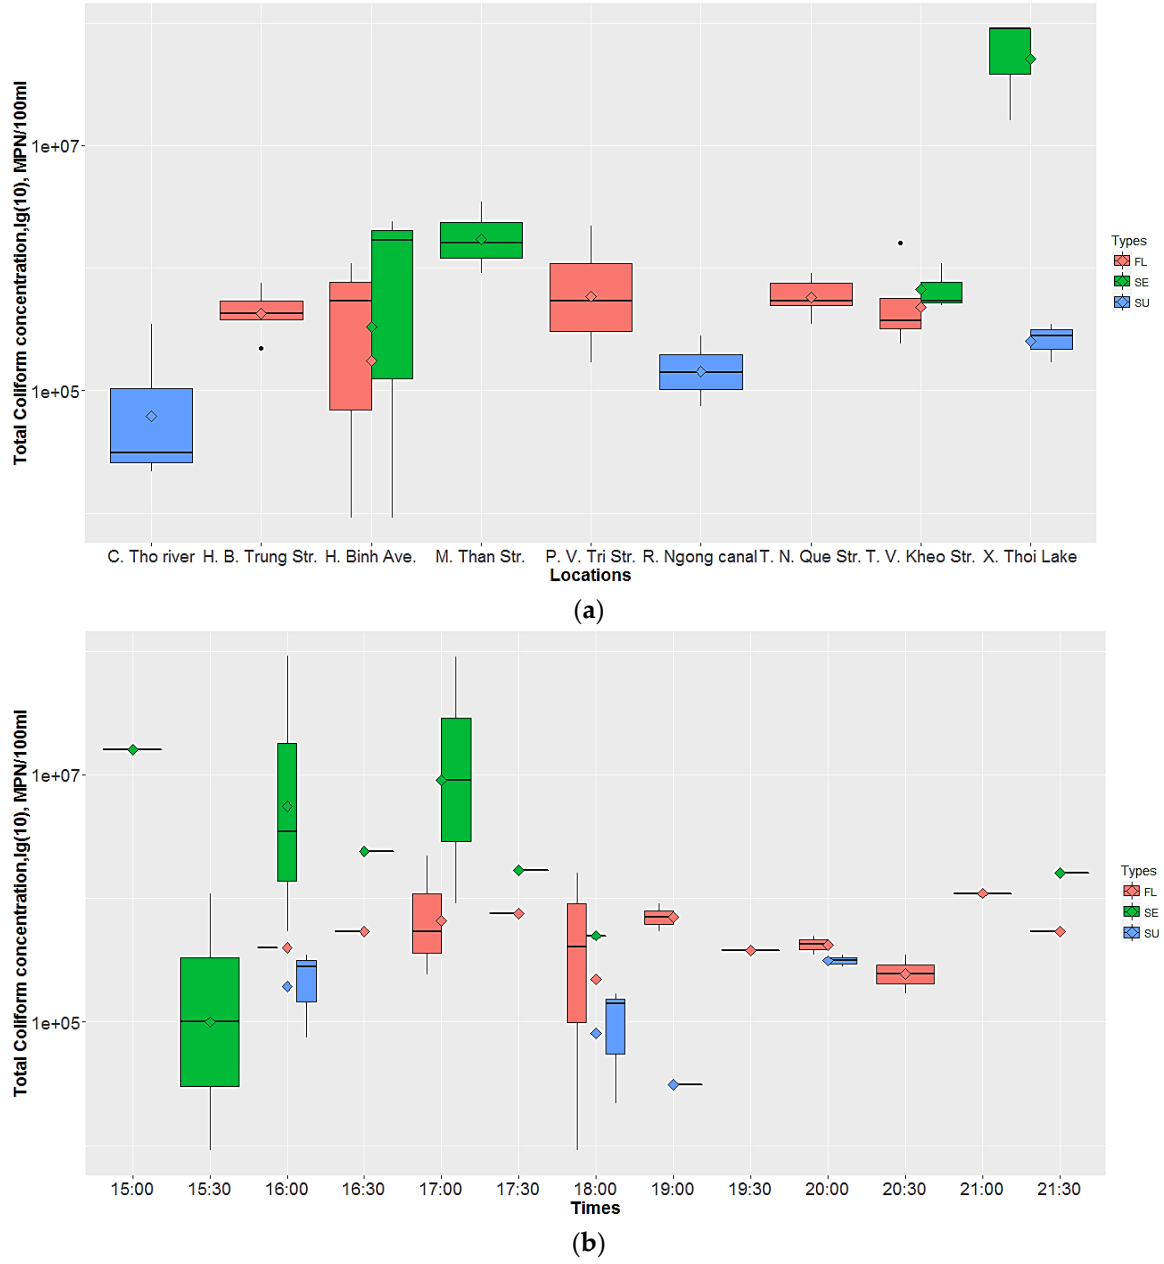

**Figure S3.** Box plot of variations of Total Coliform concentration during flood event Locations **(a)**, Time **(b)** (SU: Open/Surface water, SE: Sewer Water, FL: Flood water; the diamond symbols representing average values).

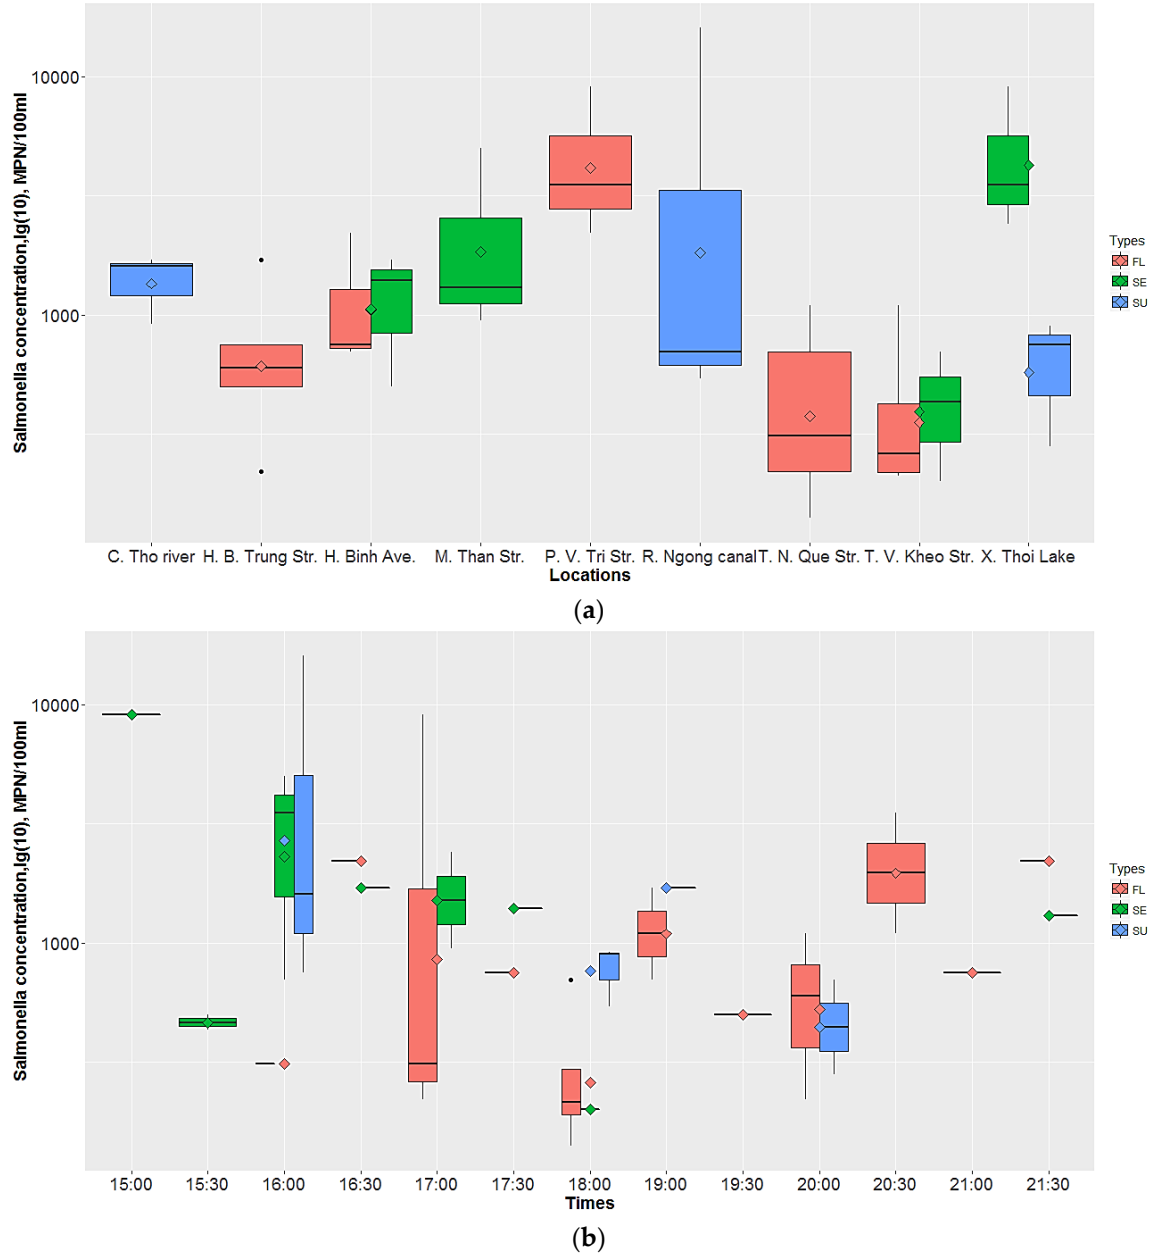

**Figure S4.** Box plot of variations of Salmonella concentration during flood event Locations **(a)**, Time **(b)** (SU: Open/Surface water, SE: Sewer Water, FL: Flood water; the diamond symbols representing average values).
